# Supplementary material for: The existence of parenting styles in the owner-dog relationship
Source: PubMed Central journal article supplement (PMC5825139; doi:10.1371/journal.pone.0193471), 2018-02-23
Supplement: pone.0193471.s001.pdf [file pone.0193471.s001.pdf]

### S1 Appendix - Items measuring the uninvolved parenting style

PSDQ items in the uninvolved style following Blakely Kimble (2009) and Baumrind (2013)

|                                                                                           | Parenting style | Element                |
|-------------------------------------------------------------------------------------------|-----------------|------------------------|
| <b><i>Baumrind (2013) uninvolved style</i></b>                                            |                 |                        |
| 1. I encourage my child to talk about its troubles.                                       | authoritative   | warmth & involvement   |
| 3. I know the names of my child's friends.                                                | authoritative   | warmth & involvement   |
| 5. I give praise when my child is good.                                                   | authoritative   | warmth & involvement   |
| 8. I withhold scolding and/or criticism even when my child acts contrary to my wishes.    | permissive      | ignoring misbehavior   |
| 9. I show sympathy when my child is hurt or frustrated.                                   | authoritative   | warmth & involvement   |
| 11. I spoil my child. <sup>BK</sup>                                                       | permissive      | lack of follow through |
| 12. I give comfort and understanding when my child is upset.                              | authoritative   | warmth & involvement   |
| 15. I allow my child to annoy someone else.                                               | permissive      | ignoring misbehavior   |
| 20. I state punishments to my child and do not actually do them. <sup>BK</sup>            | permissive      | lack of follow through |
| 21. I am responsive to my child's feelings or needs.                                      | authoritative   | warmth & involvement   |
| 27. I tell my child that we appreciate what it tries or accomplishes.                     | authoritative   | warmth & involvement   |
| 33. I am aware of problems or concerns about my child in school.                          | authoritative   | warmth & involvement   |
| 34. I threaten my child with punishment more often than actually giving it. <sup>BK</sup> | permissive      | lack of follow through |
| 35. I express affection by hugging, kissing, and holding my child.                        | authoritative   | warmth & involvement   |
| 36. I ignore my child's misbehavior.                                                      | permissive      | ignoring misbehavior   |
| 38. I carry out discipline after my child misbehaves.                                     | permissive      | lack of follow through |
| 39. I apologize to my child when making a mistake in parenting                            | authoritative   | warmth & involvement   |
| 41. I give into my child when it causes a commotion about something. <sup>BK</sup>        | permissive      | lack of follow through |
| 45. I allow my child to interrupt others.                                                 | permissive      | ignoring misbehavior   |
| 46. I have warm and intimate times together with my child.                                | authoritative   | warmth & involvement   |
| 49. I promise rewards to my child to bring about compliance.                              | permissive      | lack of follow through |
| <b><i>Blakely Kimble (2009) uninvolved style</i></b>                                      |                 |                        |
| 4. I find it difficult to discipline my child.                                            | permissive      | self confidence        |
| 10. I punish by taking privileges away from my child with little if any explanations.     | authoritarian   | non-reasoning/punitive |
| 11. I spoil my child. <sup>B</sup>                                                        | permissive      | lack of follow through |
| 13. I yell or shout when my child misbehaves.                                             | authoritarian   | verbal hostility       |
| 20. I state punishments to my child and do not actually do them. <sup>B</sup>             | permissive      | lack of follow through |

|                                                                                                                      |               |                        |
|----------------------------------------------------------------------------------------------------------------------|---------------|------------------------|
| 28. I punish by putting my child off somewhere alone with little if any explanations.                                | authoritarian | non-reasoning/punitive |
| 34. I threaten my child with punishment more often than actually giving it. <sup>B</sup>                             | permissive    | lack of follow through |
| 41. I give into my child when it causes a commotion about something. <sup>B</sup>                                    | permissive    | lack of follow through |
| 54. I use threats as punishment with little or no justification.                                                     | authoritarian | non-reasoning/punitive |
| 56. When my child asks why he/she has to conform, I state: because I said so, or I am your parent and I want you to. | authoritarian | non-reasoning/punitive |
| 58. I explain the consequences of the child's behavior.                                                              | authoritative | reasoning/induction    |
| 62. I emphasize the reasons for rules.                                                                               | authoritative | reasoning/induction    |

<sup>B</sup> – Item also in Baumrind-measurement of uninvolved style, <sup>BK</sup> – Item also in Blakely Kimble-measurement of uninvolved style
