# Supplementary material for: The existence of parenting styles in the owner-dog relationship
Source: PubMed Central journal article supplement (PMC5825139; doi:10.1371/journal.pone.0193471), 2018-02-23
Supplement: pone.0193471.s002.pdf [file pone.0193471.s002.pdf]

**S1 Table - Overview of PCA-item loadings**

Results of loadings after rotation from PCA-analysis for 32/62-PSDQ (Robinson et al., 1995) and new dog-directed parenting styles in 518 Dutch dog owning parents; presented are the loadings  $\geq |0.4|$ .

| Item                                                                                                              | $\mu \pm s.d.$ | Authoritarian<br>32-items | Authoritarian<br>62-items | Authoritarian<br>- correction<br>orientated<br>(new DD-<br>PSDQ) | Authoritative<br>32-items -<br>intrinsic | Authoritative<br>62-items -<br>intrinsic | Authoritative<br>- intrinsic<br>value<br>orientated<br>(new DD-<br>PSDQ) | Authoritative<br>32-items -<br>training | Authoritative<br>62-items -<br>training | Authoritative<br>- training<br>orientated<br>(new DD-<br>PSDQ) |
|-------------------------------------------------------------------------------------------------------------------|----------------|---------------------------|---------------------------|------------------------------------------------------------------|------------------------------------------|------------------------------------------|--------------------------------------------------------------------------|-----------------------------------------|-----------------------------------------|----------------------------------------------------------------|
| I use a poke of my finger, or short kick to snap my dog out of it when it misbehaves. <sup>AN*</sup>              | 0.8±1.0        | -0.6                      | 0.6                       | 0.7                                                              | -                                        | -                                        | -                                                                        | -                                       | -                                       | -                                                              |
| I use short pulls on the leash or pull back when my dog pulls. <sup>AN</sup>                                      | 1.6±1.2        | -                         | 0.6                       | -                                                                | -                                        | -                                        | -                                                                        | -                                       | -                                       | -                                                              |
| I allow my dog to jump up on people, as long as it is friendly. <sup>PM</sup>                                     | 0.6±0.9        | -                         | -                         | -                                                                | -                                        | -                                        | -                                                                        | -                                       | -                                       | -                                                              |
| I have good times together with my dog. <sup>AV*</sup>                                                            | 3.7±0.5        | -                         | -                         | -                                                                | -                                        | -                                        | -                                                                        | -                                       | -                                       | -                                                              |
| When two dogs are fighting, I discipline first and think about why it happened later. <sup>AN</sup>               | 2.1±1.4        | -                         | -                         | -                                                                | -                                        | -                                        | -                                                                        | -                                       | -                                       | -                                                              |
| I encourage my dog to 'be dog' even when it results in a dirty or wet dog. <sup>AV*</sup>                         | 3.4±0.8        | -                         | -                         | -                                                                | -                                        | -                                        | -                                                                        | -                                       | 0.4                                     | -                                                              |
| I lure my dog with reward to solicit certain behaviour, even when it is misbehaving at that moment. <sup>PM</sup> | 2.4±1.3        | -                         | -                         | -                                                                | -                                        | -                                        | -                                                                        | -                                       | 0.5                                     | -                                                              |
| I scold or criticize when my dog's behaviour doesn't meet my expectations. <sup>AN*</sup>                         | 0.6±0.8        | -0.6                      | 0.5                       | 0.8                                                              | -                                        | -                                        | -                                                                        | -                                       | -                                       | -                                                              |
| I show respect for my dog's needs by encouraging my dog to 'be dog'. <sup>AV*</sup>                               | 3.4±0.8        | -                         | -                         | -                                                                | -                                        | -                                        | -                                                                        | -                                       | 0.4                                     | -                                                              |
| I set strict well-established rules for my dog. <sup>PM</sup>                                                     | 1.3±1.0        | -                         | -                         | -                                                                | -                                        | -                                        | -                                                                        | -                                       | -                                       | -                                                              |
| I let my dog know how I feel about its good and bad behaviour. <sup>AV*</sup>                                     | 2.9±1.0        | -                         | 0.4                       | -                                                                | -                                        | -                                        | -                                                                        | -                                       | -                                       | -                                                              |

|                                                                                                                                          |         |      |     |   |      |     |     |     |     |     |
|------------------------------------------------------------------------------------------------------------------------------------------|---------|------|-----|---|------|-----|-----|-----|-----|-----|
| I use threats as punishment without feeling need for justification towards my dog. <sup>AN*</sup>                                        | 0.4±0.8 | -0.5 | 0.6 | - | -    | -   | -   | -   | -   | -   |
| I take into account my dog's preferences in making plans. <sup>AV*</sup>                                                                 | 3.0±1.0 | -    | -   | - | 0.5  | 0.4 | 0.5 | -   | -   | -   |
| When I ask my dog to do something, he should do so, because I said so and I am its boss. <sup>AN*</sup>                                  | 2.2±1.2 | -0.5 | 0.6 | - | -0.5 | -   | -   | -   | -   | -   |
| I am unsure on how to solve my dog's misbehaviour. <sup>PM</sup>                                                                         | 0.9±1.0 | -    | -   | - | -    | -   | -   | -   | -   | -   |
| I practice behaviour step by step with my dog, so I am sure he understands what I ask of him. <sup>AV*</sup>                             | 3.1±1.0 | -    | -   | - | -    | -   | -   | 0.6 | 0.6 | 0.6 |
| I demand that my dog does things. <sup>AN</sup>                                                                                          | 1.5±1.2 | -    | 0.5 | - | -    | -   | -   | -   | -   | -   |
| I channel my dog's misbehaviour into a more acceptable activity. <sup>AV</sup>                                                           | 3.1±0.9 | -    | -   | - | -    | -   | -   | -   | 0.6 | -   |
| I shove my dog when he is disobedient. <sup>AN</sup>                                                                                     | 0.7±0.9 | -    | 0.6 | - | -    | -   | -   | -   | -   | -   |
| I use more or higher value reward (food or toy) when I believe my dog should really do something in a situation. <sup>AV*</sup>          | 2.9±1.2 | -    | -   | - | -    | -   | -   | 0.7 | 0.5 | 0.6 |
| I encourage my dog to show how it feels by its body language, I see growling as a signal of my dog's emotion for example. <sup>AV*</sup> | 2.0±1.3 | -    | -   | - | 0.5  | 0.4 | 0.6 | -   | -   | -   |
| I guide my dog by punishment more than by tapping into its natural needs. <sup>AN</sup>                                                  | 0.3±0.7 | -    | 0.5 | - | -    | -   | -   | -   | -   | -   |
| I know the names of my dog's play mates. <sup>AV</sup>                                                                                   | 3.1±1.1 | -    | -   | - | -    | -   | -   | -   | -   | -   |
| I find it difficult to discipline my dog. <sup>PM*</sup>                                                                                 | 0.8±1.0 | -    | -   | - | -    | -   | -   | -   | -   | -   |
| I give praise when my dog is good. <sup>AV*</sup>                                                                                        | 3.7±0.6 | -    | -   | - | -    | -   | -   | 0.6 | 0.6 | 0.7 |

|                                                                                                                    |         |      |      |     |     |     |     |   |      |   |
|--------------------------------------------------------------------------------------------------------------------|---------|------|------|-----|-----|-----|-----|---|------|---|
| I use a corrective slap when my dog misbehaves. <sup>AN*</sup>                                                     | 0.7±1.0 | -0.7 | 0.7  | 0.8 | -   | -   | -   | - | -    | - |
| I play and have fun with my dog. <sup>AV</sup>                                                                     | 3.7±0.6 | -    | -    | -   | -   | -   | -   | - | 0.5  | - |
| I set consequences when my dog acts contrary to my wishes. <sup>PM</sup>                                           | 2.0±1.3 | -    | -0.4 | -   | -   | -   | -   | - | -0.4 | - |
| I show sympathy when my dog is hurt or frustrated. <sup>AV</sup>                                                   | 3.0±1.1 | -    | -    | -   | -   | 0.6 | -   | - | -    | - |
| I punish by taking away toys from my dog. <sup>AN*</sup>                                                           | 0.2±0.7 | -    | -    | -   | -   | -   | -   | - | -    | - |
| I spoil my dog. <sup>PM*</sup>                                                                                     | 2.3±1.1 | -    | -    | -   | 0.6 | 0.6 | -   | - | -    | - |
| I give comfort when my dog is upset. <sup>AV*</sup>                                                                | 2.5±1.3 | -    | -    | -   | 0.6 | 0.6 | 0.6 | - | -    | - |
| I yell or shout when my dog misbehaves. <sup>AN*</sup>                                                             | 1.1±1.1 | -0.7 | 0.6  | 0.8 | -   | -   | -   | - | -    | - |
| I am easy going and relaxed with my dog. <sup>AV</sup>                                                             | 3.3±0.8 | -    | -    | -   | -   | -   | -   | - | -    | - |
| I allow my dog to greet someone else, regardless of that person's appreciation of dogs. <sup>PM</sup>              | 1.2±1.2 | -    | -    | -   | -   | -   | -   | - | -    | - |
| I practice certain behaviour with my dog before asking this behaviour in a more difficult situation. <sup>AV</sup> | 2.9±1.1 | -    | -    | -   | -   | -   | -   | - | 0.7  | - |
| I raise my voice to make my dog improve. <sup>AN*</sup>                                                            | 1.9±1.2 | -0.7 | 0.6  | 0.6 | -   | -   | -   | - | -    | - |
| I show patience with my dog. <sup>AV</sup>                                                                         | 3.2±0.8 | -    | -    | -   | -   | -   | -   | - | -    | - |
| I grab my dog when it is being disobedient. <sup>AN*</sup>                                                         | 1.1±1.1 | -0.6 | 0.6  | 0.5 | -   | -   | -   | - | -    | - |
| I threaten with punishments towards my dog and do not actually do them. <sup>PM*</sup>                             | 0.3±0.7 | -0.4 | 0.5  | -   | -   | -   | -   | - | -    | - |
| I am responsive to my dog's feelings or needs. <sup>AV*</sup>                                                      | 3.2±0.9 | -    | -    | -   | 0.5 | 0.4 | 0.6 | - | 0.5  | - |
| I allow my dog to give input on decisions for instance with regard to the route we follow on walks. <sup>AV*</sup> | 1.6±1.3 | -    | -    | -   | 0.7 | 0.6 | 0.7 | - | -    | - |
| I struggle with my dog. <sup>AN</sup>                                                                              | 0.4±0.8 | -    | -    | -   | -   | -   | -   | - | -    | - |

|                                                                                                                                               |         |      |     |     |     |     |     |   |     |     |     |
|-----------------------------------------------------------------------------------------------------------------------------------------------|---------|------|-----|-----|-----|-----|-----|---|-----|-----|-----|
| I am confident about training skills towards my dog. <sup>PM</sup>                                                                            | 0.7±0.8 | -    | -   | -   | -   | -   | -   | - | -   | -   | -   |
| I think about why rules should be obeyed by my dog. <sup>AV*</sup>                                                                            | 3.3±0.9 | -    | -   | -   | -   | -   | -   | - | 0.6 | 0.6 | 0.6 |
| I am more concerned with own feelings than with my dog's feelings. <sup>AN</sup>                                                              | 1.1±1.0 | -    | -   | -   | -   | -   | -   | - | -   | -   | -   |
| I tell my dog 'good dog' when he tries to follow guidance, even if he does not succeed. <sup>AV</sup>                                         | 3.0±1.0 | -    | -   | -   | -   | -   | -   | - | -   | -   | -   |
| I punish by giving my dog 'time out' and walking away if he misbehaves, even if he finds the situation he is in uncomfortable. <sup>AN*</sup> | 1.1±1.2 | -    | -   | -   | -   | -   | -   | - | -   | -   | -   |
| I help my dog to understand the impact of its behaviour by offering him choices in situations. <sup>AV*</sup>                                 | 1.5±1.3 | -    | -   | -   | -   | -   | -   | - | -   | -   | -   |
| I am afraid that disciplining my dog for misbehaviour will cause him to like me less. <sup>PM</sup>                                           | 0.4±1.0 | -    | -   | -   | -   | -   | -   | - | -   | -   | -   |
| I take my dog's desires into account before asking him to do something. <sup>AV*</sup>                                                        | 1.9±1.2 | -    | -   | -   | 0.6 | 0.5 | 0.7 | - | -   | -   | -   |
| I can explode in anger towards my dog when he does something he knows I don't want him to do. <sup>AN*</sup>                                  | 0.4±0.7 | -0.6 | 0.6 | 0.6 | -   | -   | -   | - | -   | -   | -   |
| I am aware of problems or concerns about my dog that neighbours (may) have. <sup>AV</sup>                                                     | 1.9±1.5 | -    | -   | -   | -   | -   | -   | - | -   | -   | -   |
| I threaten my dog with punishment more often than actually giving it. <sup>PM*</sup>                                                          | 0.4±0.8 | -    | -   | -   | -   | -   | -   | - | -   | -   | -   |
| I express affection, for instance by rubbing my dog under its chin. <sup>AV</sup>                                                             | 3.6±0.7 | -    | -   | -   | -   | -   | -   | - | -   | -   | -   |
| I ignore my dog's misbehaviour such as chasing game, barking                                                                                  | 0.9±1.2 | -    | -   | -   | -   | -   | -   | - | -   | -   | -   |

|                                                                                                                    |         |      |     |     |   |     |   |   |   |     |   |
|--------------------------------------------------------------------------------------------------------------------|---------|------|-----|-----|---|-----|---|---|---|-----|---|
| at other people or peeing against stores in a shopping area. <sup>PM</sup>                                         |         |      |     |     |   |     |   |   |   |     |   |
| I use physical punishment as a way to improve my dog's behaviour. <sup>AN*</sup>                                   | 0.6±1.0 | -0.6 | 0.6 | 0.8 | - | -   | - | - | - | -   | - |
| I carry out discipline after my dog misbehaves. <sup>PM</sup>                                                      | 1.7±1.2 | -    | -   | -   | - | -   | - | - | - | -   | - |
| I feel bad towards my dog when making a mistake in guiding it. <sup>AV</sup>                                       | 1.9±1.3 | -    | -   | -   | - | -   | - | - | - | -   | - |
| I let my dog know what I expect from him. <sup>AV</sup>                                                            | 3.2±0.8 | -    | -   | -   | - | -   | - | - | - | -   | - |
| I give into my dog when he causes a commotion about something or doesn't do something I want it to. <sup>PM*</sup> | 0.8±1.0 | -    | -   | -   | - | 0.5 | - | - | - | -   | - |
| I think about why my dog does something when it misbehaves. <sup>AV</sup>                                          | 3.2±0.9 | -    | -   | -   | - | -   | - | - | - | 0.6 | - |

---

<sup>AN</sup> - Authoritarian item in the original PSDQ, <sup>AV</sup> - Authoritative item in the original PSDQ, <sup>PM</sup> - Permissive item in the original PSDQ, \* - 32-PSDQ
