# Supplementary material for: The existence of parenting styles in the owner-dog relationship
Source: PubMed Central journal article supplement (PMC5825139; doi:10.1371/journal.pone.0193471), 2018-02-23
Supplement: pone.0193471.s004.pdf [file pone.0193471.s004.pdf]

### S3 Table - 62-item dog-directed PSDQ Principal Component Analysis

Dutch dog owning parents ( $N=518$ ) reported on dog-directed parenting in 62 items adapted from the Parenting Styles and Dimensions Questionnaire (PSDQ). Answers on a five-point Likert scale were analysed by Principal Component Analysis and presented are the loadings  $\geq |0.4|$  and percentages of variation explained by the main components, which represented dimensions of parenting authoritatively and authoritarian.

| Item                                                                                                                           | Variance explained (latent root) |                           |                                                           |
|--------------------------------------------------------------------------------------------------------------------------------|----------------------------------|---------------------------|-----------------------------------------------------------|
|                                                                                                                                | 13% (8.0)<br>Authoritative       | 9% (5.3)<br>Authoritarian | 7% (4.5)<br>Authoritative -<br>intrinsic<br>value/emotion |
| I practice certain behaviour with my dog before asking this behaviour in a more difficult situation. <sup>AV</sup>             | 0.7                              |                           |                                                           |
| I practice behaviour step by step with my dog, so I am sure he understands what I ask of him. <sup>AV</sup>                    | 0.6                              |                           |                                                           |
| I think about why my dog does something when it misbehaves. <sup>AV</sup>                                                      | 0.6                              |                           |                                                           |
| I channel my dog's misbehaviour into a more acceptable activity. <sup>AV</sup>                                                 | 0.6                              |                           |                                                           |
| I think about why rules should be obeyed by my dog. <sup>AV</sup>                                                              | 0.6                              |                           |                                                           |
| I give praise when my dog is good. <sup>AV</sup>                                                                               | 0.6                              |                           |                                                           |
| I use more or higher value reward (food or toy) when I believe my dog should really do something in a situation. <sup>AV</sup> | 0.5                              |                           |                                                           |
| I play and have fun with my dog. <sup>AV</sup>                                                                                 | 0.5                              |                           |                                                           |
| I lure my dog with reward to solicit certain behaviour, even when it is misbehaving at that moment. <sup>PM!</sup>             | 0.5                              |                           |                                                           |
| I am responsive to my dog's feelings or needs. <sup>AV</sup>                                                                   | 0.5                              |                           |                                                           |
| I encourage my dog to 'be dog' even when it results in a dirty or wet dog. <sup>AV</sup>                                       | 0.4                              |                           |                                                           |
| I show respect for my dog's needs by encouraging my dog to 'be dog'. <sup>AV</sup>                                             | 0.4                              |                           |                                                           |
| I set consequences when my dog acts contrary to my wishes. <sup>PM!</sup>                                                      | -0.4                             |                           |                                                           |
| I use a corrective slap when my dog misbehaves. <sup>AN</sup>                                                                  |                                  |                           | 0.7                                                       |
| I use physical punishment (for instance a slap or a correction chain) as a way to improve my dog's behaviour. <sup>AN</sup>    |                                  |                           | 0.6                                                       |
| I use short pulls on the leash or pull back when my dog pulls. <sup>AN</sup>                                                   |                                  |                           | 0.6                                                       |
| I grab my dog when he is being disobedient. <sup>AN</sup>                                                                      |                                  |                           | 0.6                                                       |
| I raise my voice to make my dog improve. <sup>AN</sup>                                                                         |                                  |                           | 0.6                                                       |

|                                                                                                                    |      |     |
|--------------------------------------------------------------------------------------------------------------------|------|-----|
| I yell or shout when my dog misbehaves. <sup>AN</sup>                                                              | 0.6  |     |
| When I ask my dog to do something, he should do so, because I said so and I am its boss. <sup>AN</sup>             | 0.6  |     |
| I shove my dog when he is disobedient. <sup>AN</sup>                                                               | 0.6  |     |
| I use threats as punishment without feeling need for justification towards my dog. <sup>AN</sup>                   | 0.6  |     |
| I can explode in anger towards my dog when he does something he knows I don't want him to do. <sup>AN</sup>        | 0.6  |     |
| I use a poke of my finger, or short kick to snap my dog out of it when it misbehaves. <sup>AN</sup>                | 0.6  |     |
| I demand that my dog does things. <sup>AN</sup>                                                                    | 0.5  |     |
| I guide my dog by punishment more than by tapping into its natural needs. <sup>AN</sup>                            | 0.5  |     |
| I scold or criticize when my dog's behaviour doesn't meet my expectations. <sup>AN</sup>                           | 0.5  |     |
| I threaten with punishments towards my dog and do not actually do them. <sup>PM!</sup>                             | 0.5  |     |
| I let my dog know how I feel about its good and bad behaviour. <sup>AV!</sup>                                      | 0.4  |     |
| I set consequences when my dog acts contrary to my wishes. <sup>PM!</sup>                                          | -0.4 |     |
| I give comfort when my dog is upset. <sup>AV</sup>                                                                 |      | 0.6 |
| I show sympathy when my dog is hurt or frustrated. <sup>AV</sup>                                                   |      | 0.6 |
| I spoil my dog. <sup>PM!</sup>                                                                                     |      | 0.6 |
| I allow my dog to give input on decisions for instance with regard to the route we follow on walks. <sup>AV</sup>  |      | 0.6 |
| I give into my dog when he causes a commotion about something or doesn't do something I want it to. <sup>PM!</sup> |      | 0.5 |
| I take my dog's desires into account before asking him to do something. <sup>AV</sup>                              |      | 0.5 |
| I am responsive to my dog's feelings or needs. <sup>AV</sup>                                                       |      | 0.4 |
| I encourage my dog to show how it feels, it is allowed to growl for instance, when uncomfortable. <sup>AV</sup>    |      | 0.4 |
| I take into account my dog's preferences in making plans. <sup>AV</sup>                                            |      | 0.4 |

---

<sup>AN</sup> - Authoritarian item in the original PSDQ, <sup>AV</sup> - Authoritative item, <sup>PM</sup> – Permissive item  
\* - Item in 32-PSDQ
