# Supplementary material for: The existence of parenting styles in the owner-dog relationship
Source: PubMed Central journal article supplement (PMC5825139; doi:10.1371/journal.pone.0193471), 2018-02-23
Supplement: pone.0193471.s005.pdf [file pone.0193471.s005.pdf]

**S4 Table - Second step 32-item dog-directed PSDQ Principal Component Analysis**

Dutch dog owners ( $N=518$ ) filled out a 32-item Parenting Styles and Dimensions Questionnaire (PSDQ) adapted for assessing dog-directed parenting styles. Answers on a five-point Likert scale were analysed by Principal Components Analysis, omitting items with loadings  $< |0.4|$  for the main components. Presented are the final outcomes on eighteen items with loadings  $\geq |0.4|$  and percentages of variation explained by two components of parenting authoritarian-correction orientated (two times four items), one component of authoritative-intrinsic value orientated (six items) and one of authoritative-training orientated (four items), together explaining 48% of variation.

|                                                                                                                                | Variation explained (latent root)                     |                                                         |                                                    |                                          |
|--------------------------------------------------------------------------------------------------------------------------------|-------------------------------------------------------|---------------------------------------------------------|----------------------------------------------------|------------------------------------------|
|                                                                                                                                | 22%                                                   | 6%                                                      | 12%                                                | 8%                                       |
|                                                                                                                                | (4.6)                                                 | (1.2)                                                   | (2.6)                                              | (1.8)                                    |
|                                                                                                                                | Authoritarian-<br>correction<br>orientated-<br>verbal | Authoritarian-<br>correction<br>orientated-<br>physical | Authoritative-<br>intrinsic<br>value<br>orientated | Authoritative-<br>training<br>orientated |
| <b><i>Authoritarian – correction orientated - verbal</i></b>                                                                   |                                                       |                                                         |                                                    |                                          |
| I yell or shout when my dog misbehaves. <sup>AN</sup>                                                                          | 0.76                                                  |                                                         |                                                    |                                          |
| I scold or criticize when my dog's behaviour doesn't meet my expectations. <sup>AN</sup>                                       | 0.75                                                  |                                                         |                                                    |                                          |
| I can explode in anger towards my dog when he does something he knows I don't want him to do. <sup>AN</sup>                    | 0.61                                                  |                                                         |                                                    |                                          |
| I raise my voice to make my dog improve. <sup>AN</sup>                                                                         | 0.55                                                  |                                                         |                                                    |                                          |
| <b><i>Authoritarian – correction orientated - physical</i></b>                                                                 |                                                       |                                                         |                                                    |                                          |
| I use physical punishment (for instance a slap or a correction chain) as a way to improve my dog's behaviour. <sup>AN</sup>    |                                                       | 0.79                                                    |                                                    |                                          |
| I use a corrective slap when my dog misbehaves. <sup>AN</sup>                                                                  |                                                       | 0.75                                                    |                                                    |                                          |
| I use a poke of my finger, or short kick to snap my dog out of it when it misbehaves. <sup>AN</sup>                            |                                                       | 0.74                                                    |                                                    |                                          |
| I grab my dog when he/she is being disobedient. <sup>AN</sup>                                                                  |                                                       | 0.45                                                    |                                                    |                                          |
| <b><i>Authoritative – intrinsic value orientated</i></b>                                                                       |                                                       |                                                         |                                                    |                                          |
| I allow my dog to give input on decisions for instance with regard to the route we follow on walks. <sup>AV</sup>              |                                                       |                                                         | 0.73                                               |                                          |
| I take my dog's desires into account before asking him to do something. <sup>AV</sup>                                          |                                                       |                                                         | 0.65                                               |                                          |
| I am responsive to my dog's feelings or needs. <sup>AV</sup>                                                                   |                                                       |                                                         | 0.61                                               |                                          |
| I encourage my dog to show how it feels, it is allowed to growl for instance, when uncomfortable. <sup>AV</sup>                |                                                       |                                                         | 0.58                                               |                                          |
| I give comfort when my dog is upset. <sup>AV</sup>                                                                             |                                                       |                                                         | 0.55                                               |                                          |
| I take into account my dog's preferences in making plans. <sup>AV</sup>                                                        |                                                       |                                                         | 0.51                                               |                                          |
| <b><i>Authoritative – training orientated</i></b>                                                                              |                                                       |                                                         |                                                    |                                          |
| I give praise when my dog is good. <sup>AV</sup>                                                                               |                                                       |                                                         |                                                    | 0.69                                     |
| I practice behaviour step by step with my dog, so I am sure he understands what I ask of him. <sup>AV</sup>                    |                                                       |                                                         |                                                    | 0.64                                     |
| I use more or higher value reward (food or toy) when I believe my dog should really do something in a situation. <sup>AV</sup> |                                                       |                                                         |                                                    | 0.58                                     |
| I think about why rules should be obeyed by my dog. <sup>AV</sup>                                                              |                                                       |                                                         |                                                    | 0.58                                     |

<sup>AN</sup> - Authoritarian item in the original PSDQ, <sup>AV</sup> - Authoritative item in the original PSDQ
